# Supplementary material for: Validation and comparison of the molecular classifications of pancreatic carcinomas
Source: Mol Cancer. 2017 Nov 6;16:168. doi: 10.1186/s12943-017-0739-z (PMC5674743; doi:10.1186/s12943-017-0739-z)
Supplement: Supplementary file 2 — Clinicopathological characteristics of samples and correlations with molecular subtypes of the four classifications (XLSX 14 kb) [file 12943_2017_739_MOESM2_ESM.xlsx]

## Sheet: Table S2
Supplementary Table 2: Clinicopathological characteristics of samples and correlations with molecular subtypes of the four classifications.
Charateristics		All (N=846)	Moffitt "tumor" subtypes			Moffitt "stroma" subtypes			Collisson subtypes				Bailey subtypes
			Basal-like	Classical	P*	Activated	Normal	P*	Classical	Exocrine-like	Quasi-Mesenchymal	P*	ADEX**	Immunogenic	Pancreatic Progenitor	Squamous	P*
Age at diagnosis (years)					0.0338			0.428				0.823					0.109
	≤60	121 (32%)	60 (38%)	61 (27%)		69 (34%)	47 (30%)		55 (32%)	40 (31%)	26 (35%)		27 (31%)	21 (29%)	19 (23%)	54 (39%)
	>60	260 (68%)	98 (62%)	162 (73%)		133 (66%)	109 (70%)		118 (68%)	91 (69%)	49 (65%)		59 (69%)	52 (71%)	63 (77%)	86 (61%)
Sex					0.558			0.69				0.367					0.53
	female	194 (45%)	81 (44%)	113 (47%)		110 (47%)	78 (45%)		87 (46%)	65 (42%)	42 (51%)		40 (40%)	37 (47%)	38 (42%)	79 (49%)
	male	235 (55%)	105 (56%)	130 (53%)		126 (53%)	97 (55%)		102 (54%)	91 (58%)	40 (49%)		59 (60%)	41 (53%)	52 (58%)	83 (51%)
AJCC Stage					0.827			0.0967				0.231					0.505
	1	68 (12%)	24 (11%)	44 (13%)		28 (9%)	39 (17%)		27 (12%)	22 (11%)	19 (15%)		19 (15%)	11 (11%)	15 (12%)	23 (11%)
	2	440 (79%)	176 (79%)	264 (78%)		244 (82%)	179 (76%)		188 (81%)	163 (81%)	87 (70%)		97 (74%)	77 (79%)	108 (84%)	158 (79%)
	3	10 (2%)	4 (2%)	6 (2%)		5 (2%)	4 (2%)		4 (2%)	3 (1%)	3 (2%)		4 (3%)	3 (3%)	0 (0%)	3 (1%)
	4	41 (7%)	18 (8%)	23 (7%)		21 (7%)	14 (6%)		13 (6%)	13 (6%)	15 (12%)		11 (8%)	7 (7%)	6 (5%)	17 (8%)
Pathological type					0.00328			0.000495				0.000626					7e-06
	ductal	758 (99%)	336 (100%)	422 (97%)		418 (100%)	255 (96%)		296 (100%)	272 (96%)	188 (100%)		169 (94%)	122 (99%)	179 (100%)	288 (100%)
	other***	11 (1%)	0 (0%)	11 (3%)		1 (0%)	10 (4%)		1 (0%)	10 (4%)	0 (0%)		10 (6%)	1 (1%)	0 (0%)	0 (0%)
Pathological grade					0.00417			0.00356				1.7e-05					<1.00E-06
	1	34 (12%)	7 (6%)	27 (16%)		11 (7%)	22 (19%)		10 (8%)	23 (21%)	1 (2%)		21 (29%)	5 (10%)	4 (6%)	4 (4%)
	2	158 (54%)	66 (52%)	92 (56%)		103 (61%)	53 (46%)		83 (66%)	53 (48%)	22 (42%)		30 (41%)	34 (69%)	40 (65%)	54 (50%)
	3	97 (33%)	52 (41%)	45 (27%)		54 (32%)	38 (33%)		32 (25%)	35 (32%)	28 (54%)		22 (30%)	9 (18%)	18 (29%)	48 (45%)
	4	2 (1%)	1 (1%)	1 (1%)		1 (1%)	1 (1%)		1 (1%)	0 (0%)	1 (2%)		0 (0%)	1 (2%)	0 (0%)	1 (1%)
Pathological tumor size (pT)					0.742			0.00458				0.00844					0.0144
	pT1	19 (5%)	5 (3%)	14 (6%)		3 (1%)	15 (9%)		11 (6%)	3 (2%)	5 (6%)		5 (5%)	5 (7%)	6 (6%)	3 (2%)
	pT2	69 (17%)	28 (18%)	41 (16%)		41 (19%)	25 (14%)		19 (10%)	30 (20%)	20 (26%)		22 (23%)	7 (9%)	11 (11%)	29 (20%)
	pT3	311 (76%)	120 (76%)	191 (75%)		168 (77%)	128 (74%)		148 (81%)	112 (75%)	49 (64%)		62 (66%)	61 (80%)	80 (82%)	108 (76%)
	pT4	11 (3%)	4 (3%)	7 (3%)		5 (2%)	5 (3%)		4 (2%)	4 (3%)	3 (4%)		5 (5%)	3 (4%)	0 (0%)	3 (2%)
Pathological lymph node status (pN)					0.613			0.263				0.408					0.809
	negative	149 (32%)	56 (30%)	93 (33%)		75 (30%)	69 (35%)		69 (34%)	47 (28%)	33 (34%)		30 (29%)	30 (34%)	37 (33%)	52 (31%)
	positive	321 (68%)	129 (70%)	192 (67%)		177 (70%)	128 (65%)		135 (66%)	121 (72%)	63 (66%)		75 (71%)	57 (66%)	74 (67%)	115 (69%)
Deaths, number (%)		354 (58.9%)	153 (64.83%)	201 (55.07%)		207 (62.16%)	130 (53.94%)		149 (56.65%)	116 (53.7%)	89 (72.95%)		70 (50%)	56 (53.85%)	79 (55.63%)	149 (69.3%)
Median OS, months (range)		20 (1-156.4)	15.6 (1-156.4)	22.9 (1-127.9)		17.7 (1-126)	23 (1-156.4)		20.7 (0-104.11)	21.4 (0-127.9)	15 (0-156.4)		22.7 (0-126)	30 (0-127.9)	23.1 (0.03-71.69)	15 (0-156.4)
2-year OS [95%CI]		40% [36-45]	28% [22-36]	48% [42-54]	8.83e-07	34% [28-40]	49% [43-57]	7.56e-05	45% [39-52]	44% [36-52]	25% [18-35]	0.00165	46% [37-57]	56% [47-68]	48% [39-58]	23% [17-30]	5.78e-08
*, p-value of the comparison between molecular subtypes
** ADEX, aberrantly differentiated endocrine exocrine
*** other types include 8 neuroendocrine, 2 acinar, 1 intraductal tubulopapillary neoplasm (ITPN)
