# Supplementary material for: Validation and comparison of the molecular classifications of pancreatic carcinomas
Source: Mol Cancer. 2017 Nov 6;16:168. doi: 10.1186/s12943-017-0739-z (PMC5674743; doi:10.1186/s12943-017-0739-z)
Supplement: Supplementary file 4 — Common genes between the four multigene classifiers (XLSX 14 kb) [file 12943_2017_739_MOESM4_ESM.xlsx]

## Sheet: Table S4
Table S4: Common genes within the four multigene classifiers.
Gene Symbol	Gene description	EntrezGene ID	Included in Bailey's classifier (707 genes)	Included in Collisson's classifier (62 genes)	Included in Moffitt's "tumor" classifier (50 genes)	Included in Moffitt's "stroma" classifier (48 genes)	N° of classifiers containing the gene
TFF1	trefoil factor 1	7031	yes	yes	yes		3
S100A2	S100 calcium binding protein A2	6273	yes	yes	yes		3
LGALS4	galectin 4	3960	yes	yes	yes		3
TSPAN8	tetraspanin 8	7103	yes	yes	yes		3
AGR2	anterior gradient 2, protein disulphide isomerase family member	10551	yes	yes	yes		3
ST6GALNAC1	ST6 N-acetylgalactosaminide alpha-2,6-sialyltransferase 1	55808	yes	yes	yes		3
CEACAM6	carcinoembryonic antigen related cell adhesion molecule 6	4680	yes	yes	yes		3
TFF3	trefoil factor 3	7033	yes	yes	yes		3
CELA3B	chymotrypsin like elastase family member 3B	23436	yes	yes			2
CLPS	colipase	1208	yes	yes			2
PRSS1	protease, serine 1	5644	yes	yes			2
CELA3A	chymotrypsin like elastase family member 3A	10136	yes	yes			2
CTRB2	chymotrypsinogen B2	440387	yes	yes			2
PLA2G1B	phospholipase A2 group IB	5319	yes	yes			2
GP2	glycoprotein 2	2813	yes	yes			2
CELA2B	chymotrypsin like elastase family member 2B	51032	yes	yes			2
CPB1	carboxypeptidase B1	1360	yes	yes			2
REG1B	regenerating family member 1 beta	5968	yes	yes			2
CTSE	cathepsin E	1510	yes		yes		2
LYZ	lysozyme	4069	yes		yes		2
BTNL8	butyrophilin like 8	79908	yes		yes		2
KRT6A	keratin 6A	3853	yes		yes		2
REG1A	regenerating family member 1 alpha	5967	yes	yes			2
PLA2G10	phospholipase A2 group X	8399	yes		yes		2
REG3A	regenerating family member 3 alpha	5068	yes	yes			2
LINC00675	long intergenic non-protein coding RNA 675	100289255	yes		yes		2
CAV1	caveolin 1	857	yes	yes			2
PNLIP	pancreatic lipase	5406	yes	yes			2
TOX3	TOX high mobility group box family member 3	27324	yes	yes			2
PRR15L	proline rich 15 like	79170	yes		yes		2
CLRN3	clarin 3	119467	yes		yes		2
REG4	regenerating family member 4	83998	yes		yes		2
KRT14	keratin 14	3861	yes	yes			2
PLS1	plastin 1	5357	yes	yes			2
SLC4A4	solute carrier family 4 member 4	8671	yes	yes			2
FAM3D	family with sequence similarity 3 member D	131177	yes		yes		2
CAPN8	calpain 8	388743	yes	yes			2
MYO1A	myosin IA	4640	yes		yes		2
GPR87	G protein-coupled receptor 87	53836	yes		yes		2
MUC13	mucin 13, cell surface associated	56667	yes	yes			2
VSIG2	V-set and immunoglobulin domain containing 2	23584	yes		yes		2
GPX2	glutathione peroxidase 2	2877	yes	yes			2
FAM83A	family with sequence similarity 83 member A	84985	yes		yes		2
ERBB3	erb-b2 receptor tyrosine kinase 3	2065	yes	yes			2
SPRR1B	small proline rich protein 1B	6699	yes		yes		2
AIM2	absent in melanoma 2	9447	yes	yes			2
TWIST1	twist family bHLH transcription factor 1	7291	yes	yes			2
NT5E	5'-nucleotidase ecto	4907	yes	yes			2
ATP10B	ATPase phospholipid transporting 10B (putative)	23120	yes	yes			2
SCEL	sciellin	8796	yes		yes		2
KRT6C	keratin 6C	286887	yes		yes		2
CST6	cystatin E/M	1474	yes		yes		2
LY6D	lymphocyte antigen 6 family member D	8581	yes		yes		2
TNS4	tensin 4	84951	yes		yes		2
CYP3A7	cytochrome P450 family 3 subfamily A member 7	1551	yes		yes		2
FN1	fibronectin 1	2335	yes			yes	2
AHNAK2	AHNAK nucleoprotein 2	113146	yes	yes			2
KRT17	keratin 17	3872	yes		yes		2
ANXA10	annexin A10	11199	yes		yes		2
SPINK1	serine peptidase inhibitor, Kazal type 1	6690	yes	yes			2
SPRR3	small proline rich protein 3	6707	yes		yes		2
GPM6B	glycoprotein M6B	2824		yes		yes	2
